# Supplementary material for: Creating Locally-Resolved Mobile-Source Emissions Inputs for Air Quality Modeling in Support of an Exposure Study in Detroit, Michigan, USA
Source: PubMed Central journal article supplement (PMC4276644; doi:10.3390/ijerph111212739), 2014-12-09

## Creating Locally-Resolved Mobile-Source Emissions Inputs for Air Quality Modeling in Support of an Exposure Study in Detroit, Michigan, U.S.A.

**Table S1.** Acronyms used in this manuscript.

| <b>Acronym</b> | <b>Description</b>                                           |
|----------------|--------------------------------------------------------------|
| AADT           | Average Annual Daily Traffic                                 |
| CAADT          | Commercial Average Annual Daily Traffic                      |
| DET            | Detroit City Airport                                         |
| EF             | Emission Factor                                              |
| EPA            | Environmental Protection Agency                              |
| FHWA           | Federal Highway Administration                               |
| HD             | High Diesel                                                  |
| HDDV           | Heavy-Duty Diesel Vehicles                                   |
| HDGV           | Heavy-Duty Gasoline Vehicles                                 |
| HPMS           | Highway Performance Monitoring System                        |
| HTHD           | High Traffic High Diesel                                     |
| HTLD           | High Traffic Low Diesel                                      |
| LD             | Low Diesel                                                   |
| LDDT           | Light-Duty Diesel Trucks                                     |
| LDDV           | Light-Duty Diesel Vehicles                                   |
| LDGT1          | Light-Duty Gasoline Trucks1                                  |
| LDGT2          | Light-Duty Gasoline Trucks2                                  |
| LDGV           | Light-Duty Gasoline Vehicles                                 |
| LT             | Low Traffic                                                  |
| MC             | Motorcycles                                                  |
| MDOT           | Michigan Department of Transportation                        |
| MOVES          | Motor Vehicle Emissions Simulator                            |
| NEXUS          | Near-Road Exposure and Effects of Urban Air Pollutants Study |
| NFC            | National Functional Class                                    |
| NWS            | National Weather Service                                     |
| PTR            | Permanent Traffic Recorders                                  |
| R-LINE         | Research Dispersion Model for Line Sources                   |
| SEMCOG         | Southeast Michigan Council of Governments                    |
| TAF            | Temporal Allocation Factor                                   |
| TDM            | Travel Demand Model                                          |
| VMT            | Vehicle Miles Traveled                                       |

**Figure S1.** National functional class (NFC) designations for the Detroit area.

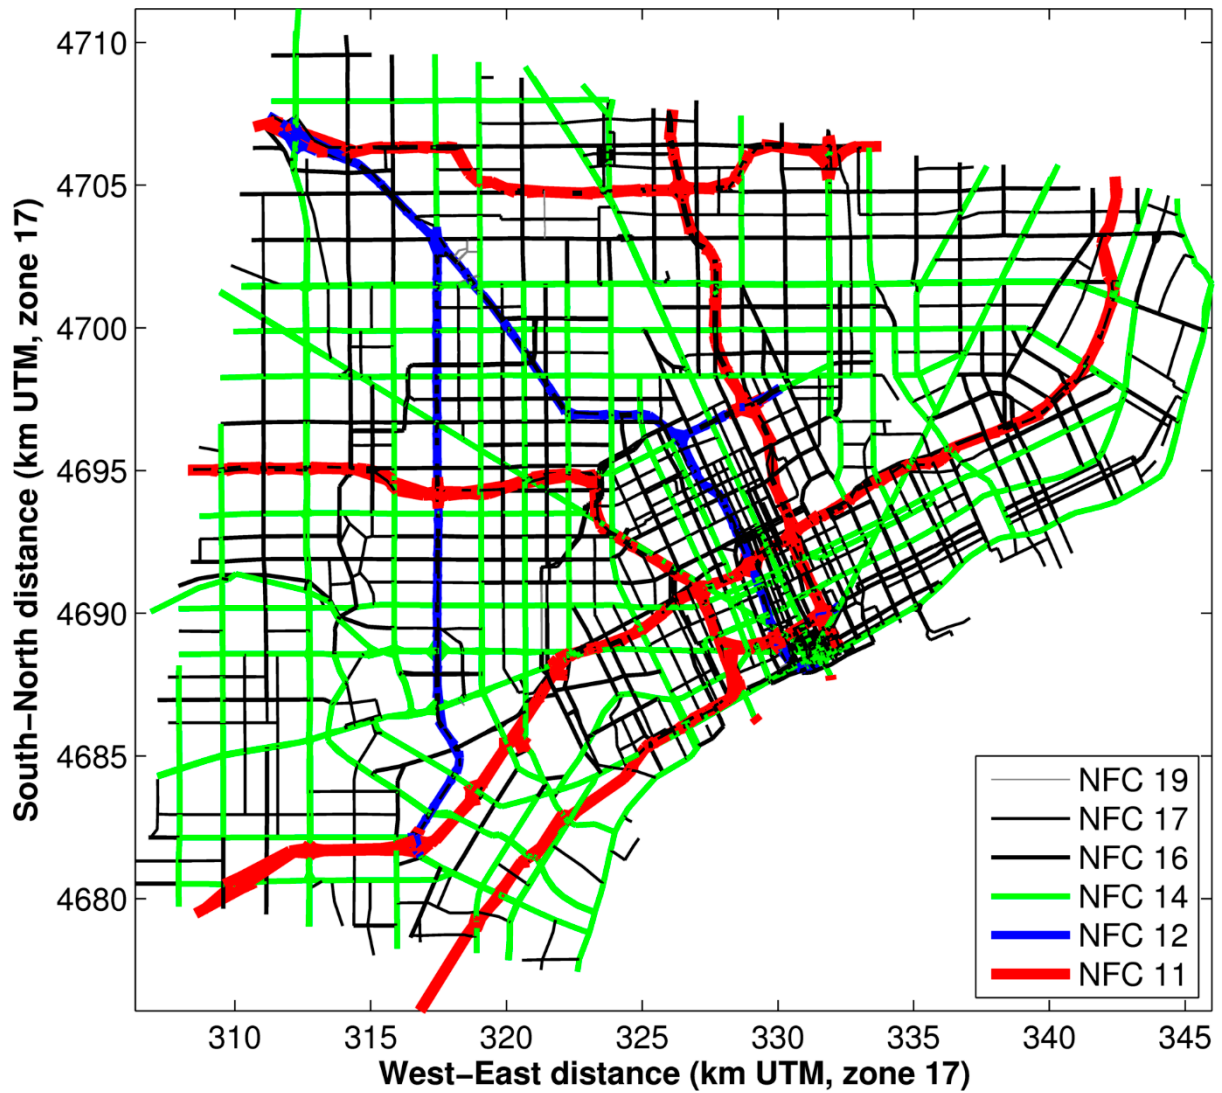

**Figure S2.** Temporal allocation factors (TAFs) for time of day (weekday: top left, weekend: top right), day of week (bottom left), and month of year (bottom right).

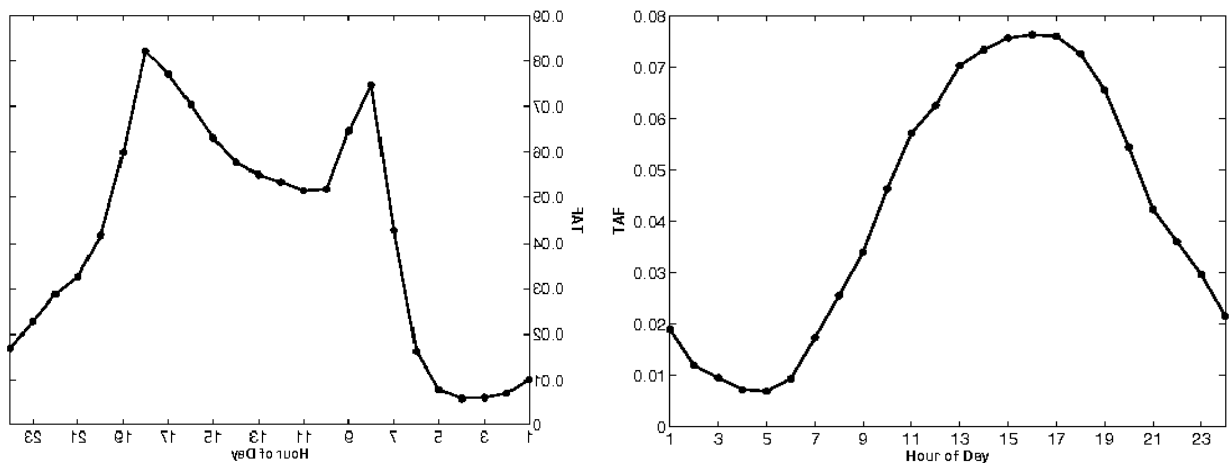

Figure S2. Cont.

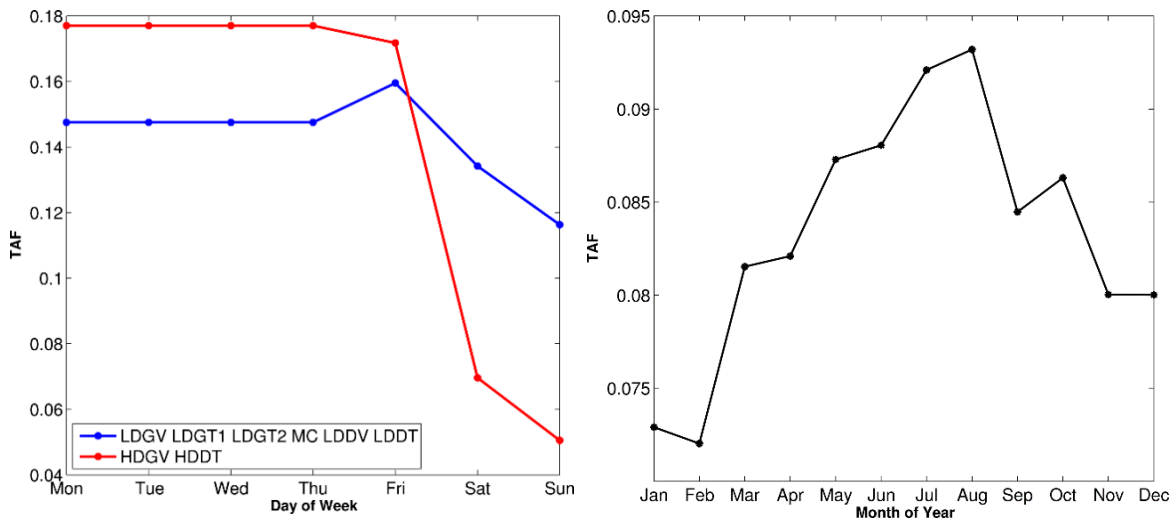

Figure S3. Emissions of PM<sub>2.5</sub>, NO<sub>x</sub>, and CO as a function of speed for August 2010 for a temperature of 55 °F.

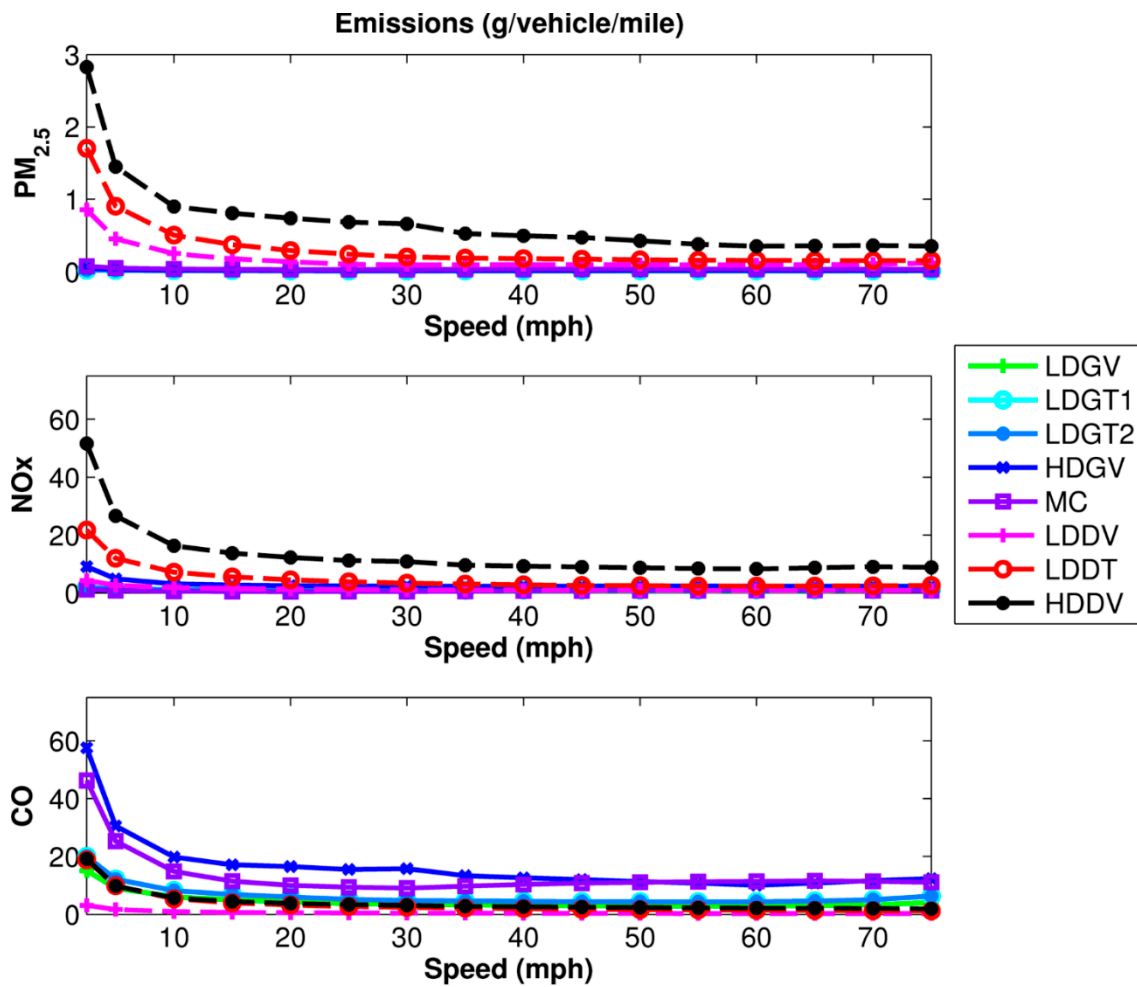

**Figure S4.** Emissions of PM<sub>2.5</sub>, NO<sub>x</sub>, and CO as a function of temperature for August 2010 for a speed of 45 mph.

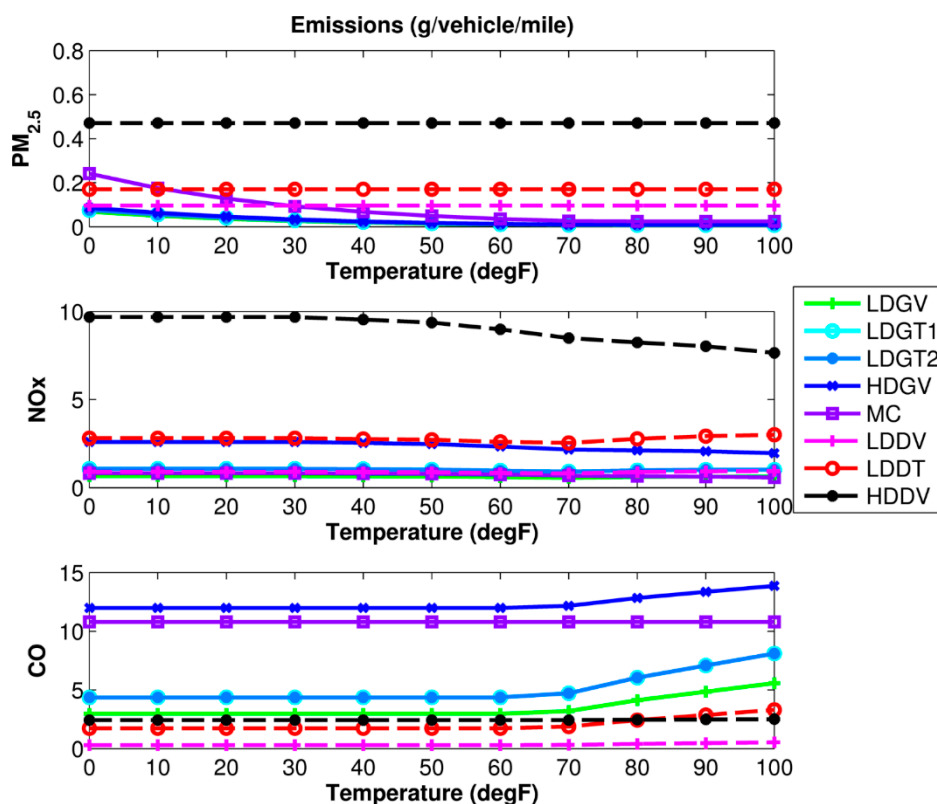

**Figure S5.** Locations of PTR measurements by id in Detroit, MI, USA.

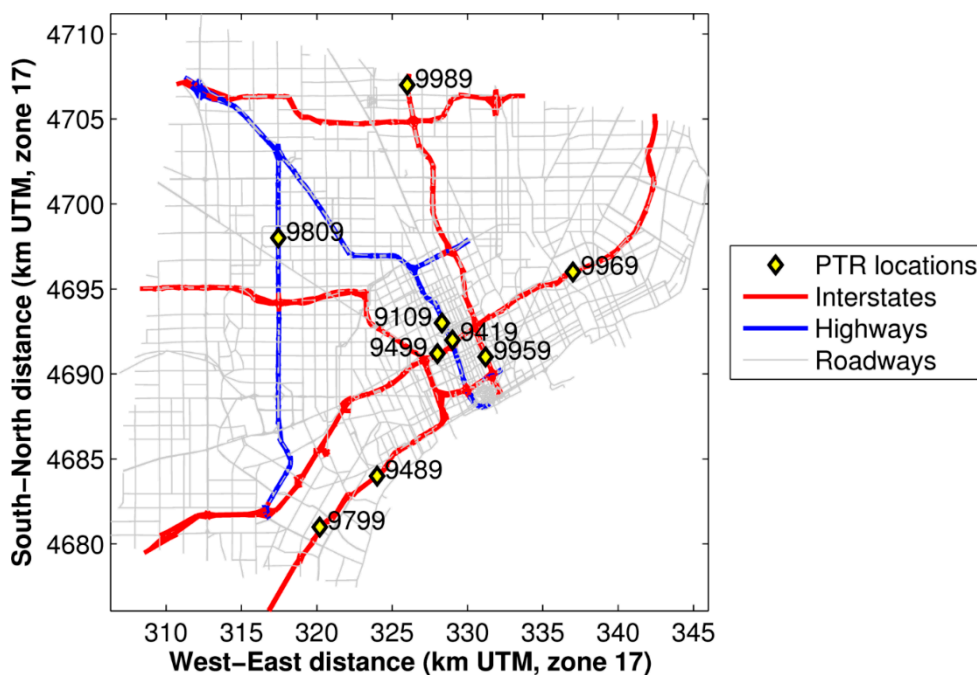

Supplement: ijerph-11-12739-s001.pdf [file ijerph-11-12739-s001.pdf]
